# Supplementary material
Source: Elsevier journal article supplement (https://comptes-rendus.academie-sciences.fr/biologies/article/10.1016/j.crvi.2014.08.004/file/attach/mmc1.pdf)
Supplement: mmc1 [file mmc1.pdf]

**Table S1: GM haplotype frequencies in groups of populations from Europe, Africa and Western Asia.**

| Population                                             | Abbrev.      | N      | Region*    | GM*1,17 5 | GM*1 21 | GM*1,2 21 | GM*3 5 a | GM* 1,17 16 | Others | Genetic Diversity (H ± S.D.) | References           |
|--------------------------------------------------------|--------------|--------|------------|-----------|---------|-----------|----------|-------------|--------|------------------------------|----------------------|
| 1 Galicia (Spain) <sup>M</sup>                         | <b>GALC</b>  | 357    | <b>IB</b>  | 0.045     | 0.199   | 0.075     | 0.679    | 0.001       | 0.000  | 0.491 ± 0.027                | [1]                  |
| 2 Pas Mountains (Spain) <sup>M</sup>                   | <b>CANT</b>  | 98     | <b>IB</b>  | 0.025     | 0.323   | 0.036     | 0.571    | 0.046       | 0.000  | 0.569 ± 0.036                | [2]                  |
| 3 Biscay Basques (Spain) <sup>M</sup>                  | <b>VIZC</b>  | 86     | <b>IB</b>  | 0.023     | 0.289   | 0.072     | 0.604    | 0.012       | 0.000  | 0.554 ± 0.043                | [3]                  |
| 4 Alava Basques (Spain) <sup>M</sup>                   | <b>ALAV</b>  | 122    | <b>IB</b>  | 0.012     | 0.242   | 0.083     | 0.648    | 0.004       | 0.011  | 0.505 ± 0.040                | [3]                  |
| 5 Gipuzkoa Basques (Spain) <sup>M</sup>                | <b>GUIP</b>  | 97     | <b>IB</b>  | 0.021     | 0.350   | 0.021     | 0.592    | 0.016       | 0.000  | 0.536 ± 0.033                | [3]                  |
| 6 Navarre Basques (Spain) <sup>M</sup>                 | <b>NAVA</b>  | 118    | <b>IB</b>  | 0.013     | 0.281   | 0.075     | 0.622    | 0.000       | 0.009  | 0.533 ± 0.037                | [4]                  |
| 7 Pyrenees (Spain) <sup>M</sup>                        | <b>SPYR</b>  | 388    | <b>IB</b>  | 0.026     | 0.264   | 0.069     | 0.639    | 0.003       | 0.000  | 0.518 ± 0.022                | [5, 6]               |
| 8 Valencia (Spain) <sup>M</sup>                        | <b>VALC</b>  | 186    | <b>IB</b>  | 0.019     | 0.215   | 0.089     | 0.677    | 0.000       | 0.000  | 0.494 ± 0.035                | [7]                  |
| 9 Huelva (Andalucía, Spain) <sup>M</sup>               | <b>ANDL1</b> | 252    | <b>IB</b>  | 0.038     | 0.232   | 0.034     | 0.689    | 0.004       | 0.004  | 0.473 ± 0.030                | [8]                  |
| 10 Granada (Andalucía, Spain) <sup>M</sup>             | <b>ANDL2</b> | 195    | <b>IB</b>  | 0.044     | 0.199   | 0.051     | 0.696    | 0.005       | 0.005  | 0.477 ± 0.037                | <i>Present study</i> |
| 11 Canary Islands (Spain) <sup>M</sup>                 | <b>CANR</b>  | 99     | <b>IB</b>  | 0.026     | 0.247   | 0.077     | 0.650    | 0.000       | 0.000  | 0.521 ± 0.046                | [9]                  |
| 12 Portugal <sup>M</sup>                               | <b>PORT</b>  | 419    | <b>IB</b>  | 0.020     | 0.209   | 0.076     | 0.695    | 0.000       | 0.000  | 0.469 ± 0.024                | [10]                 |
| 13 France <sup>M</sup>                                 | <b>FRAN</b>  | 2 314  | <b>EUR</b> | 0.009     | 0.205   | 0.089     | 0.697    | 0.000       | 0.000  | 0.464 ± 0.010                | [11]                 |
| 14 Macaye Basques (France) <sup>M</sup>                | <b>MACY</b>  | 123    | <b>EUR</b> | 0.004     | 0.201   | 0.071     | 0.724    | 0.000       | 0.000  | 0.433 ± 0.045                | [12]                 |
| 15 St.-Jean-Pied-de-Port Basques (France) <sup>M</sup> | <b>SJPP</b>  | 100    | <b>EUR</b> | 0.010     | 0.269   | 0.056     | 0.660    | 0.005       | 0.000  | 0.493 ± 0.043                | [12]                 |
| 16 Mauleon Basques (France) <sup>M</sup>               | <b>MAUL</b>  | 253    | <b>EUR</b> | 0.014     | 0.232   | 0.076     | 0.674    | 0.004       | 0.000  | 0.489 ± 0.030                | [12]                 |
| 17 Corsica (France) <sup>M</sup>                       | <b>CORS</b>  | 138    | <b>EUR</b> | 0.040     | 0.140   | 0.067     | 0.763    | 0.000       | 0.000  | 0.408 ± 0.048                | [11]                 |
| 18 England                                             | <b>ENGL</b>  | 1 000  | <b>EUR</b> | 0.000     | 0.229   | 0.119     | 0.652    | 0.000       | 0.000  | 0.509 ± 0.014                | [13]                 |
| 19 Scotland                                            | <b>SCOT</b>  | 355    | <b>EUR</b> | 0.000     | 0.211   | 0.119     | 0.670    | 0.000       | 0.000  | 0.492 ± 0.008                | [10]                 |
| 20 Ireland                                             | <b>IRLN</b>  | 294    | <b>EUR</b> | 0.000     | 0.217   | 0.144     | 0.639    | 0.000       | 0.000  | 0.525 ± 0.026                | [13]                 |
| 21 Iceland                                             | <b>ICEL</b>  | 585    | <b>EUR</b> | 0.000     | 0.222   | 0.173     | 0.605    | 0.000       | 0.000  | 0.556 ± 0.016                | [10]                 |
| 22 Denmark                                             | <b>DENM</b>  | 1 000  | <b>EUR</b> | 0.000     | 0.214   | 0.124     | 0.662    | 0.000       | 0.000  | 0.501 ± 0.015                | [13]                 |
| 23 Norway                                              | <b>NORW</b>  | 879    | <b>EUR</b> | 0.000     | 0.230   | 0.147     | 0.623    | 0.000       | 0.000  | 0.538 ± 0.014                | [10]                 |
| 24 Germany                                             | <b>GERM</b>  | 18 187 | <b>EUR</b> | 0.000     | 0.190   | 0.094     | 0.716    | 0.000       | 0.000  | 0.443 ± 0.004                | [10]                 |
| 25 Poland                                              | <b>POLN</b>  | 1 205  | <b>EUR</b> | 0.000     | 0.149   | 0.056     | 0.795    | 0.000       | 0.000  | 0.343 ± 0.016                | [10]                 |
| 26 Netherlands                                         | <b>NETH</b>  | 709    | <b>EUR</b> | 0.004     | 0.188   | 0.103     | 0.705    | 0.000       | 0.000  | 0.458 ± 0.019                | [13]                 |
| 27 Austria                                             | <b>AUST</b>  | 1 602  | <b>EUR</b> | 0.000     | 0.185   | 0.074     | 0.741    | 0.000       | 0.000  | 0.412 ± 0.013                | [14]                 |
| 28 Hungary                                             | <b>HUNG</b>  | 184    | <b>EUR</b> | 0.003     | 0.144   | 0.050     | 0.789    | 0.014       | 0.000  | 0.358 ± 0.041                | [10]                 |
| 29 Czechoslovakia                                      | <b>CZEC</b>  | 2 665  | <b>EUR</b> | 0.001     | 0.168   | 0.061     | 0.770    | 0.000       | 0.000  | 0.376 ± 0.010                | [10]                 |

|    |                                                 |             |       |            |       |       |       |       |       |       |               |                           |
|----|-------------------------------------------------|-------------|-------|------------|-------|-------|-------|-------|-------|-------|---------------|---------------------------|
| 30 | Italy <sup>M</sup>                              | <b>ITA1</b> | 682   | <b>EUR</b> | 0.007 | 0.176 | 0.039 | 0.778 | 0.000 | 0.000 | 0.364 ± 0.020 | [10, 15]                  |
| 31 | Pavia (Italy) <sup>M</sup>                      | <b>ITA2</b> | 277   | <b>EUR</b> | 0.016 | 0.119 | 0.038 | 0.820 | 0.007 | 0.000 | 0.314 ± 0.034 | [16]                      |
| 32 | Sicily-Madonie (Italy) <sup>M</sup>             | <b>SICL</b> | 297   | <b>EUR</b> | 0.035 | 0.159 | 0.044 | 0.760 | 0.002 | 0.000 | 0.394 ± 0.032 | [17]                      |
| 33 | Sardinia (Italy) <sup>M</sup>                   | <b>SAR1</b> | 441   | <b>EUR</b> | 0.029 | 0.127 | 0.013 | 0.830 | 0.001 | 0.000 | 0.295 ± 0.026 | [10, 18]                  |
| 34 | Sardinia (Italy) <sup>M</sup>                   | <b>SAR2</b> | 1 208 | <b>EUR</b> | 0.023 | 0.107 | 0.006 | 0.832 | 0.002 | 0.030 | 0.294 ± 0.016 | [18]                      |
| 35 | Yugoslavia <sup>M</sup>                         | <b>YUGS</b> | 1 230 | <b>EUR</b> | 0.009 | 0.145 | 0.044 | 0.802 | 0.000 | 0.000 | 0.334 ± 0.016 | [10]                      |
| 36 | Croatia <sup>M</sup>                            | <b>CRO1</b> | 869   | <b>EUR</b> | 0.004 | 0.125 | 0.040 | 0.829 | 0.002 | 0.000 | 0.297 ± 0.019 | [19]                      |
| 37 | Pag Islands (Croatia) <sup>M</sup>              | <b>CRO2</b> | 691   | <b>EUR</b> | 0.011 | 0.121 | 0.035 | 0.829 | 0.001 | 0.003 | 0.299 ± 0.021 | [20]                      |
| 38 | Albania <sup>M</sup>                            | <b>ALBA</b> | 112   | <b>EUR</b> | 0.027 | 0.214 | 0.013 | 0.742 | 0.004 | 0.000 | 0.397 ± 0.047 | JM Dugoujon (unpublished) |
| 39 | Greece <sup>M</sup>                             | <b>GREC</b> | 129   | <b>EUR</b> | 0.006 | 0.162 | 0.014 | 0.818 | 0.000 | 0.000 | 0.305 ± 0.015 | [10]                      |
| 40 | Druzes, Maronites (Lebanon) <sup>M</sup>        | <b>LIBA</b> | 216   | <b>NEA</b> | 0.032 | 0.149 | 0.012 | 0.768 | 0.019 | 0.020 | 0.387 ± 0.038 | JM Dugoujon (unpublished) |
| 41 | Yemenites (North Yemen)                         | <b>YEME</b> | 144   | <b>MEA</b> | 0.307 | 0.144 | 0.010 | 0.500 | 0.039 | 0.000 | 0.638 ± 0.025 | [21]                      |
| 42 | Khenifra Berbers (Morocco) <sup>M</sup>         | <b>MBE1</b> | 147   | <b>NAF</b> | 0.201 | 0.306 | 0.017 | 0.473 | 0.000 | 0.003 | 0.642 ± 0.020 | [22]                      |
| 43 | Bouhria Berbers (Morocco) <sup>M</sup>          | <b>MBE2</b> | 134   | <b>NAF</b> | 0.112 | 0.347 | 0.019 | 0.515 | 0.000 | 0.007 | 0.609 ± 0.026 | [22]                      |
| 44 | Doukkala Arabs (Morocco) <sup>M</sup>           | <b>MARB</b> | 98    | <b>NAF</b> | 0.215 | 0.267 | 0.021 | 0.476 | 0.000 | 0.021 | 0.660 ± 0.028 | [22]                      |
| 45 | Kabylie Berbers (Algeria) <sup>M</sup>          | <b>ABE1</b> | 227   | <b>NAF</b> | 0.205 | 0.231 | 0.018 | 0.538 | 0.009 | 0.000 | 0.617 ± 0.023 | [21]                      |
| 46 | Ghardaia Berbers (Algeria) <sup>M</sup>         | <b>ABE2</b> | 108   | <b>NAF</b> | 0.204 | 0.299 | 0.048 | 0.435 | 0.014 | 0.000 | 0.685 ± 0.023 | [21]                      |
| 47 | Sened Berbers (Tunisia) <sup>M</sup>            | <b>TBE1</b> | 63    | <b>NAF</b> | 0.208 | 0.297 | 0.009 | 0.486 | 0.000 | 0.000 | 0.646 ± 0.033 | [23]                      |
| 48 | Chenini-Douiret Berbers (Tunisia) <sup>M</sup>  | <b>TBE2</b> | 107   | <b>NAF</b> | 0.075 | 0.308 | 0.000 | 0.617 | 0.000 | 0.000 | 0.524 ± 0.036 | [24]                      |
| 49 | Takrouna-Jeradou Berbers (Tunisia) <sup>M</sup> | <b>TBE3</b> | 124   | <b>NAF</b> | 0.326 | 0.270 | 0.004 | 0.400 | 0.000 | 0.000 | 0.662 ± 0.012 | [24]                      |
| 50 | Jerba Berbers (Tunisia) <sup>M</sup>            | <b>TBE4</b> | 63    | <b>NAF</b> | 0.135 | 0.272 | 0.016 | 0.500 | 0.008 | 0.069 | 0.666 ± 0.043 | [25]                      |
| 51 | Jerba Arabs (Tunisia) <sup>M</sup>              | <b>TAR1</b> | 91    | <b>NAF</b> | 0.115 | 0.290 | 0.028 | 0.562 | 0.000 | 0.005 | 0.589 ± 0.039 | [25]                      |
| 52 | Mahdia Arabs (Tunisia) <sup>M</sup>             | <b>TAR2</b> | 236   | <b>NAF</b> | 0.102 | 0.226 | 0.051 | 0.617 | 0.004 | 0.000 | 0.556 ± 0.029 | [26]                      |
| 53 | Sfax Arabs (Tunisia) <sup>M</sup>               | <b>TAR3</b> | 142   | <b>NAF</b> | 0.147 | 0.257 | 0.022 | 0.570 | 0.004 | 0.000 | 0.592 ± 0.032 | [27]                      |
| 54 | Tripoli and Benghazi (Lybia) <sup>M</sup>       | <b>LIBY</b> | 168   | <b>NAF</b> | 0.124 | 0.292 | 0.049 | 0.535 | 0.000 | 0.000 | 0.614 ± 0.026 | [28]                      |
| 55 | Siwa Oasis (Egypt) <sup>M</sup>                 | <b>EGY1</b> | 176   | <b>NAF</b> | 0.313 | 0.045 | 0.009 | 0.440 | 0.014 | 0.179 | 0.679 ± 0.019 | JM Dugoujon (unpublished) |
| 56 | Cairo (Egypte) <sup>M</sup>                     | <b>EGY2</b> | 244   | <b>NAF</b> | 0.293 | 0.100 | 0.023 | 0.524 | 0.000 | 0.060 | 0.629 ± 0.022 | [10]                      |
| 57 | Issa (Djibouti)                                 | <b>DJIB</b> | 144   | <b>SAF</b> | 0.455 | 0.243 | 0.018 | 0.257 | 0.024 | 0.004 | 0.673 ± 0.021 | [21]                      |
| 58 | Amahra & Tigre (Ethiopia, Gondar)               | <b>ETH1</b> | 175   | <b>SAF</b> | 0.511 | 0.128 | 0.020 | 0.277 | 0.040 | 0.023 | 0.647 ± 0.026 | [21]                      |
| 59 | Sidamos (Ethiopia)                              | <b>ETH2</b> | 140   | <b>SAF</b> | 0.400 | 0.236 | 0.018 | 0.157 | 0.027 | 0.162 | 0.741 ± 0.020 | [29]                      |
| 60 | Bwa (Mali)                                      | <b>MALI</b> | 600   | <b>SAF</b> | 0.993 | 0.007 | 0.000 | 0.000 | 0.000 | 0.000 | 0.013 ± 0.007 | [21]                      |
| 61 | Baoule (Ivory Coast)                            | <b>IVOC</b> | 198   | <b>SAF</b> | 1.000 | 0.000 | 0.000 | 0.000 | 0.000 | 0.000 | 0.000         | [21]                      |
| 62 | Aka Pygmies (Central African Republic)          | <b>CAFR</b> | 900   | <b>SAF</b> | 1.000 | 0.000 | 0.000 | 0.000 | 0.000 | 0.000 | 0.000         | [21]                      |
| 63 | Angola                                          | <b>ANGO</b> | 111   | <b>SAF</b> | 0.793 | 0.000 | 0.000 | 0.000 | 0.000 | 0.207 | 0.332 ± 0.045 | [30]                      |

|    |                       |             |     |            |       |       |       |       |       |       |               |      |
|----|-----------------------|-------------|-----|------------|-------|-------|-------|-------|-------|-------|---------------|------|
| 64 | Kuanyama (Namibia)    | <b>NAM1</b> | 118 | <b>SAF</b> | 0.696 | 0.000 | 0.000 | 0.000 | 0.000 | 0.304 | 0.428 ± 0.033 | [30] |
| 65 | Khoikhoi (Namibia)    | <b>NAM2</b> | 191 | <b>SAF</b> | 0.429 | 0.000 | 0.048 | 0.000 | 0.000 | 0.523 | 0.542 ± 0.015 | [31] |
| 66 | Tonga (Zambia)        | <b>ZAM1</b> | 120 | <b>SAF</b> | 0.681 | 0.000 | 0.000 | 0.000 | 0.000 | 0.318 | 0.436 ± 0.032 | [30] |
| 67 | Mlozi (Zambia)        | <b>ZAM2</b> | 189 | <b>SAF</b> | 0.653 | 0.000 | 0.000 | 0.000 | 0.000 | 0.347 | 0.457 ± 0.021 | [30] |
| 68 | Nyambaan (Mozambique) | <b>MOZA</b> | 119 | <b>SAF</b> | 0.716 | 0.000 | 0.000 | 0.000 | 0.000 | 0.284 | 0.411 ± 0.036 | [30] |
| 69 | Malagasy (Madagascar) | <b>MADA</b> | 231 | <b>SAF</b> | 0.680 | 0.013 | 0.000 | 0.000 | 0.000 | 0.307 | 0.445 ± 0.024 | [21] |
| 70 | Zulu (South Africa)   | <b>SAFR</b> | 130 | <b>SAF</b> | 0.509 | 0.000 | 0.000 | 0.000 | 0.000 | 0.491 | 0.504 ± 0.006 | [30] |

\* *IB* = Iberian Peninsula, *EUR* = Europe, *NEA* = Near East, *MEA* = Middle East, *NAF* = North Africa, *SAF* = Sub-Saharan Africa.

<sup>M</sup> Analyzed Mediterranean space populations (N= 43)

<sup>a</sup> GM\*3 5 = GM\*3 23 5\* + GM\*3 23' 5\*.

[1] Calderon R et al. 2007. BMC Genet 8: 37. [2] Esteban E et al. 1998. Eur J Hum Genet 6: 315-324. [3] Calderon R et al. 1998. Hum Biol 70: 667-698. [4] Calderon R et al. 2000. Hum Biol 72: 619-640. [5] Giraldo MP et al. 1998. Ann Hum Biol 25: 453-465. [6] Giraldo MP et al. 2001. Ann Hum Genet 65: 537-548. [7] Schanfield MS et al. 1981. J Immunogenet 8: 529-532. [8] Calderon R et al. 2006. Hum Biol 78: 663-679. [9] Esteban E et al. 1998. Ann Hum Genet 62: 33-45. [10] Steinberg AG and Cook CE. 1981. The distribution of the human immunoglobulin allotypes. Oxford: Oxford University Press. [11] Blanc M and Ducos J. 1986. Les allotypes des systèmes GM et KM dans les provinces françaises. In: Ohayon E, Cambon-Thomsen A. Génétique des Populations: Colloque. Paris: Éditions INSERM vol. 142. p 207-226. [12] Dugoujon JM et al. 1989. Coll Antropol 13: 43-50. [13] Roychoudhury AK and Nei M. 1988. Human polymorphic genes: World distribution. New York: Oxford University Press. [14] Cavalli-Sforza LL et al. 1994. The history and geography of human genes. Princeton, NJ: Princeton University Press. [15] Larizza D et al. 1989. Autoimmunity 4: 69-78. [16] Lorini R et al. 1992. Autoimmunity 11: 255-260. [17] Cerutti N et al. 2004. Immunogenetics 55: 674-681. [18] Piazza A et al. 1976. Am J Hum Genet 28: 77-86. [19] Dugoujon JM et al. 1989. Coll Antropol 13: 291-297. [20] Borot N et al. 1991. Coll Antropol 15: 247-255. [21] Dugoujon JM et al. 2004. Am J Phys Anthropol 125: 175-192. [22] Coudray C et al. 2006. Am J Hum Biol 18: 23-34. [23] Fadhlouli-Zid K et al. 2004. Hum Biol 76: 559-567. [24] Chaabani HJ. 1984. Immunogenet 11: 107-113. [25] Loveslati BY et al. 2001. Eur J Immunogenet 28: 531-538. [26] Lefranc G et al. 1979. Hum Genet 50: 199-211. [27] Lefranc MP. 1980. Les allotypes GM, AM et KM des immunoglobines humaines dans deux échantillons de la population tunisienne (Mahdia et Sfax): Contribution à la connaissance séroanthropologique de cette population et à la génétique des immunoglobulines. Paris: Université Paris-Sud. [28] Walter H et al. 1975. Humangenetik 27: 129-136. [29] Steinberg AG. 1973. Am J Phys Anthropol 39: 403-408. [30] Jenkins T et al. 1970. Am J Phys Anthropol 32: 197-218. [31] Steinberg AG et al. 1975. Am J Hum Genet 27: 528-542.
